# Supplementary material
Source: PubMed Central journal article supplement (PMC5621875)
Supplement: jciinsight-2-91068-s001.pdf [file jciinsight-2-91068-s001.pdf]

## **Supplemental Materials.**

- 1. Extended Experimental Procedures**
- 2. Supplemental Figure 1. qPCR of cardiac growth-associated genes.**
- 3. Supplemental Figure 2. Echocardiographic measurements - TAC prevention model.**
- 4. Supplemental Figure 3. Additional echocardiographic measurements - reversal model.**
- 5. Supplemental Figure 4. HDAC5 nuclear localization.**
- 6. Supplemental Table 1. Human clinical samples.**
- 7. Supplemental Table 2. Blood chemistries of 8MI treated mice.**
- 8. Supplemental Table 3. Annotations of hypertrophy-associated genes normalized by 8MI.**
- 9. Supplemental Table 4. Ingenuity pathways and networks.**
- 10. Supplemental Table 5. Gene Set Enrichment Analysis.**

## **Extended Experimental Procedures**

### **Reagents**

Antibodies were obtained from the following vendors: anti-MEF2 and anti-HDAC4 from Santa Cruz Biotechnology (Santa Cruz, California, USA), anti-GATA4 and anti-acetyl-lysine from Upstate (Charlottesville, Virginia, USA), anti-actin from Chemicon (Danvers, Massachusetts, USA), anti-HDAC5 and anti-p(S498)-HDAC5 were from Millipore and Abcam respectively. Trichostatin A (TSA) was purchased from Selleck Chemicals and MC1568 was provided by Sigma. The Amersham ECL Western detection system (GE Healthcare Bio-Sciences, Piscataway, New Jersey, USA) was used for chemiluminescence visualization of immunoblots. Reagents for real-time polymerase chain reaction (PCR) including Master Mix® and primers with TaqMan® probes were obtained from Applied Biosystems (Foster City, California, USA). RNA extraction was performed using Trizol (Molecular Research Center, Inc, Cincinnati, Ohio, USA). Rhodamine-conjugated phalloidin and wheat germ agglutinin (WGA) were purchased from Invitrogen (Carlsbad, California, USA).

### **Myocyte cell culture**

Primary neonatal rat ventricular cardiomyocyte cultures were prepared from the hearts of 1-3 day-old neonatal rat pups (Charles River, Wilmington, Massachusetts, USA) as previously described {Bishopric, 1991 #920}, by sequential digestion in a trypsin-containing calcium-free buffer and trituration. Final cultures were >90% myocytes. Cells were allowed to attach overnight in 5% fetal bovine serum-containing minimal essential media (MEM) overnight, and then moved to serum-free MEM supplemented with holotransferrin, insulin and vitamin B12 (MEM-TIB) for at least 48h prior to experiments BrdU (0.1mM) was added to media for the first 48 hours to inhibit fibroblast proliferation. Hypertrophy was induced using FBS (5% final concentration) or norepinephrine (4 µM) in MEM-TIB. MEF2 modulators were dissolved in DMSO and added to cell cultures to varying final concentrations together with hypertrophic agonists. Cardiac myocytes were cotransfected with wt and mutant MEF2D and EP300 expression vectors using a calcium phosphate method as previously described {Bishopric, 1991 #920} and harvested at 96 hr.

### **Immunofluorescence.**

Cells were fixed with 4% paraformaldehyde for 10 minutes at room temperature. Following PBS washes, cells were permeabilized with 0.1% Triton-X in PBS and blocked with 1% bovine serum albumin for 1 hour. Primary antibodies against HDAC-4 and- 5 were incubated in 1% BSA-PBS for 1 hour at room temperature. Cells were washed 2X in PBS and then incubated with an Alexa Fluor® 488-conjugated secondary antibody for 1 hour at room temperature. Cells were then washed in PBS and cured overnight at room temperature in Prolong Gold DAPI. Cells were imaged using a Zeiss LSM 700 confocal microscope. Images were acquired using Zen 2009 Ver. 5.5, SP2.

## **Western Blot and qPCR Analysis.**

Protein samples were collected in RIPA buffer (Sigma), resolved on SDS-PAGE and transferred to nitrocellulose membranes. Membranes were blocked with 5% milk in 0.5% TBS-T for 1 hour at room temperature followed by incubation in primary antibody at appropriate dilutions overnight. The membranes were incubated in HRP-conjugated secondary antibody for 2 hours at room temperature and developed using chemiluminescence. Total RNA was extracted from left ventricular tissue using Trizol Reagent (Invitrogen, Carlsbad, CA). cDNA was synthesized using High Capacity RT-PCR kits (Invitrogen) according to the manufacturer's instructions. cDNA was amplified using TaqMan Universal PCR master mix reagent (Applied Biosystems, Foster City, CA) at the following conditions: 2 min at 50°C, 10 min at 95°C, 40 cycles: 15 s at 95°C and 1 min at 60°C in an ABI 7900HT thermocycler. mRNA expression levels were normalized to those of the internal reference 18S rRNA. All samples were run in duplicate. Data was analyzed using RQ manager software v. 1.2 (Applied Biosystems).

## **Immunoprecipitation.**

500nG of protein sample collected from heart tissue in RIPA was incubated with antibodies against acetyl-lysine, GATA4 and MEF2 (5µg). Immune complexes were captured using TrueBlot sepharose beads and subjected to Western analysis as above.

## **Murine surgery and imaging.**

All experiments were performed on 2-3 month old wild type C57BL/6 mice under protocols approved by the Institutional Review Board of University of Miami. Cardiac hypertrophy was induced by thoracic aortic constriction (TAC) as described previously, with minor variations ([Wei et al., 2008](#)). Pressure gradients induced by TAC were evaluated postoperatively by pulsed-wave Doppler echocardiography to confirm equivalent gradients in all animals ( $45 \pm 5$  mmHg). For echocardiography, mice were placed under anesthesia with 40mg/kg ketamine and 5mg/kg xylocaine and secured in a supine position. Mice were evaluated using 40-hertz transducer on a Visual Sonics 770 High Resolution Imaging System. B-mode in the short and long axis view of the ventricle was used to evaluate wall motion defects of ventricle and M-mode in long axis view used for the interventricular septal thickness, posterior wall thickness and the left ventricular dimensions in systole and diastole.

8MI Prevention protocol: 8MI or its vehicle (DMSO) was delivered via intraperitoneal (IP) injection daily for 35 days beginning one week prior to surgical intervention.

8MI Reversal protocol: Daily IP injection of 8MI was initiated beginning 4 weeks post-TAC and continued for 4 more weeks.

Swimming stress model: We used a previously established protocol for induction of hypertrophy with swimming exercise, with minor variations {Kaplan, 1994 #11929}. Mice without prior swimming experience underwent a training period of daily swimming in 32-34°C fresh water in a multi-chamber apparatus under constant observation. Swimming twice daily intervals were gradually increased from 10 minutes to 90 minutes over a 1-week interval. Swimming intervals were separated by 5 hours. On completion of training, a protocol was commenced wherein mice were required to swim for 90 minutes at a time,

twice daily, with occasional interventions (knocks on the side of the apparatus) to prevent resting or holding to the side of the chamber. Control mice were immersed briefly, removed and dried with a towel. Mice were administered DMSO or 8MI (40 mg/kg I.P.) daily, beginning one week prior to the protocol and continued throughout the next 4 weeks of swimming. At the end of 4 weeks of swimming, mice underwent echocardiographic imaging; a subset underwent euthanasia with organ morphologic studies. The remaining mice in the 8MI group were continued on the swimming protocol for an additional 4 weeks, without further administration of the compound.

### **RNASeq.**

Total RNA from mouse left ventricles (n=3-4 per treatment group) was analyzed for quality on a BioAnalyzer Nano 6000 and Illumina TruSeq total strand-specific RNA-Seq library prep was used to prepare libraries for sequencing. Sample libraries were sequenced as 75 bp single reads, using Illumina NextSeq V2 Flow Cells. Alignment of RNA-Seq reads to the mouse genome (Mus musculus UCSC mm10) was accomplished with TopHat and Cufflinks 2.1.1. Analysis of differential gene expression was performed using DESeq2 software. All applications were accessed within the Illumina BaseSpace genomic analysis environment (<http://www.illumina.com/informatics/research/sequencing-data-analysis-management/rna-seq-data-analysis.html>).

Differentially regulated transcripts were quantified and ranked for significance, with *p* cutoffs of < 0.01 for transcripts with fold change of > 0.70 or <1.5, and <0.05 for transcripts with fold change of ≤ 0.07 or ≥ 1.5. Gene Set Enrichment Analysis and Hierarchical clustering and heatmapping of expression data were respectively performed using GSEA <http://software.broadinstitute.org/gsea/index.jsp> and GENE-E <http://www.broadinstitute.org/cancer/software/GENE-E/index.html>) accessed via the Broad Institute. Annotations were obtained from the Mouse Genome Informatics (MGI) portal. Gene Ontology and Network analysis was performed using Ingenuity® software (<http://www.ingenuity.com>).

Figure S1. Wei, Joshi et al.

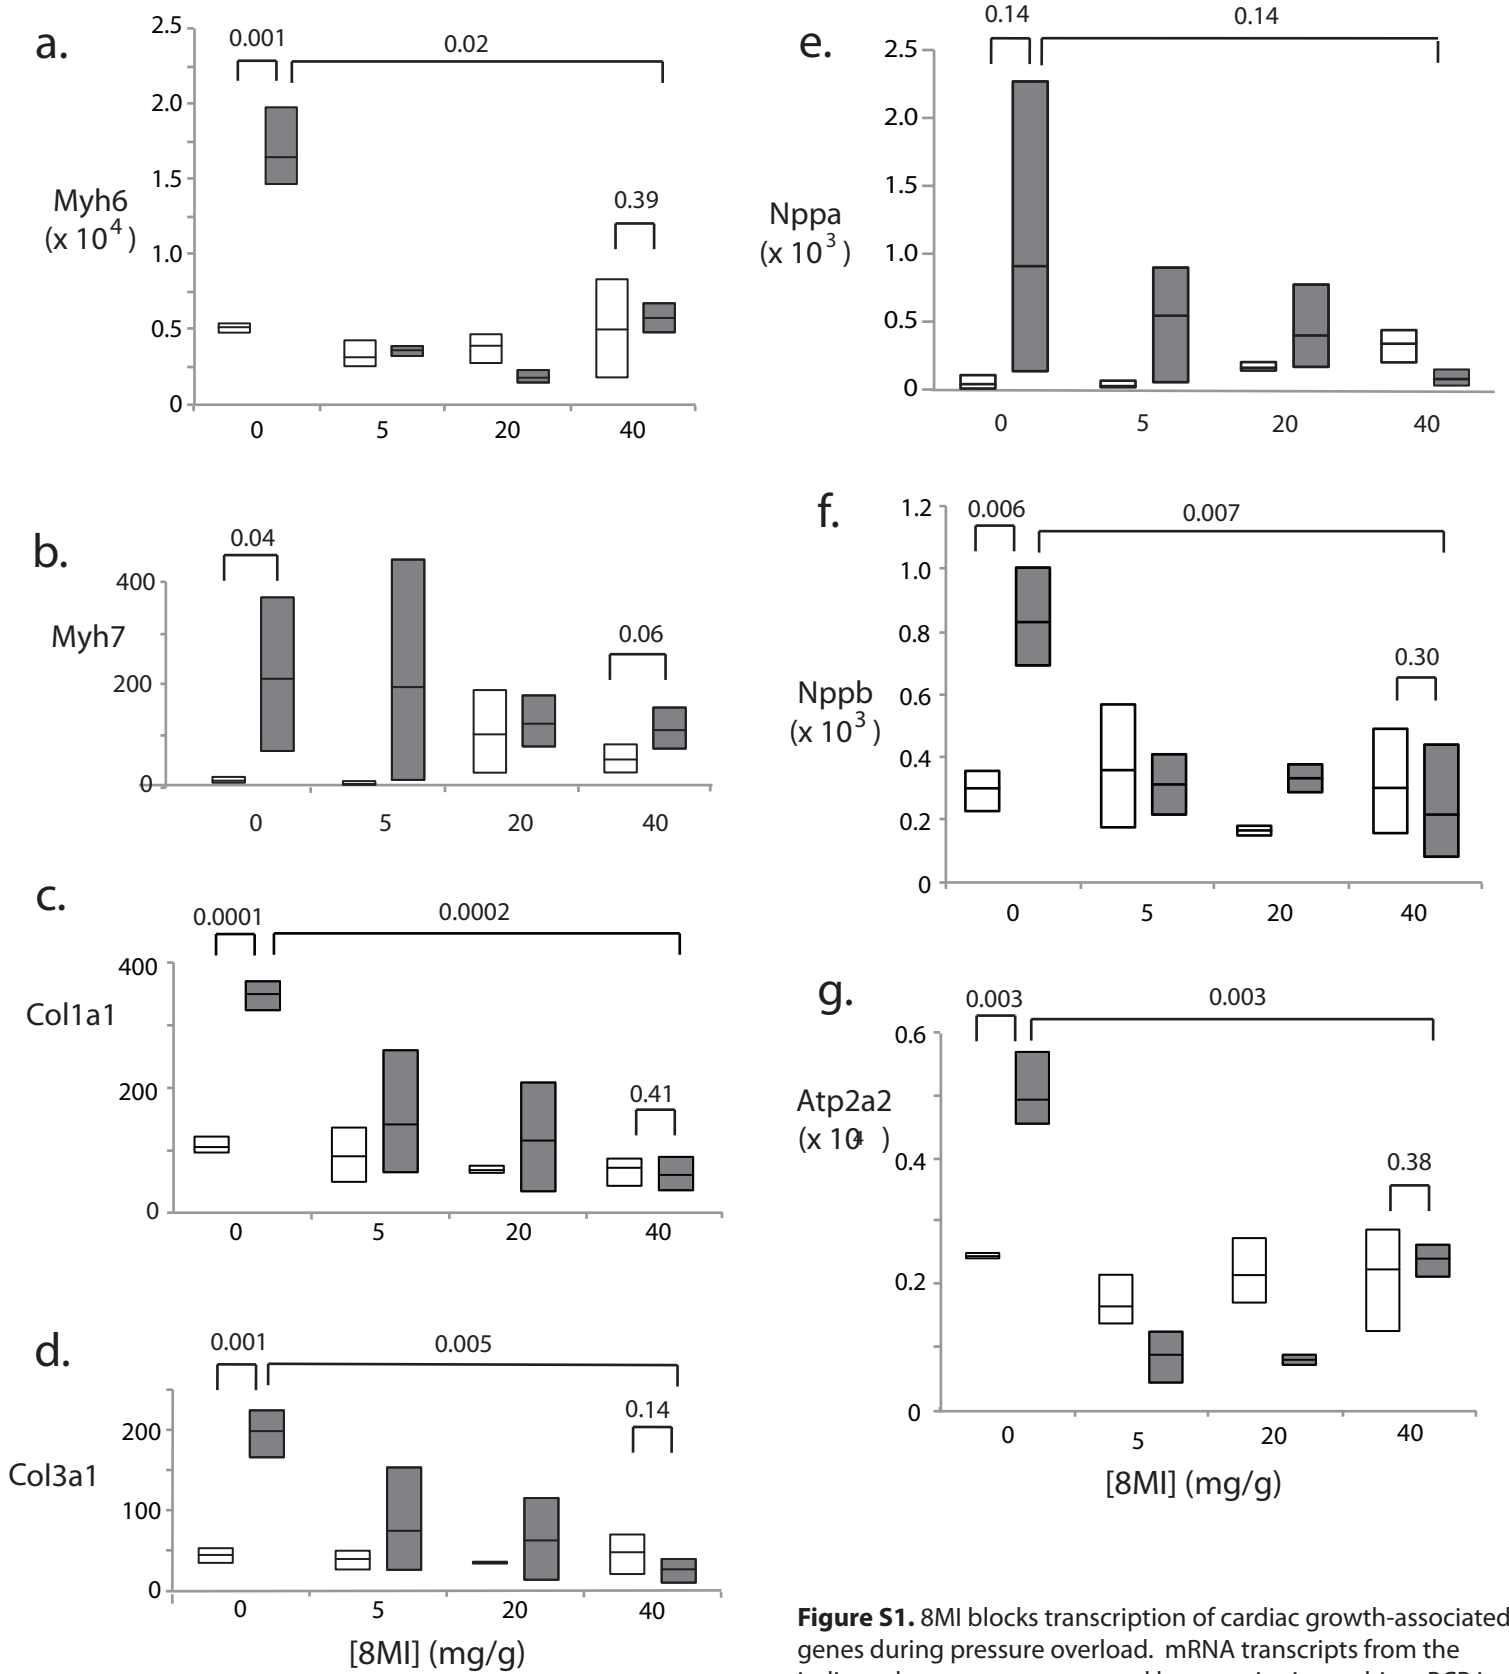

**Figure S1.** 8MI blocks transcription of cardiac growth-associated genes during pressure overload. mRNA transcripts from the indicated genes were measured by quantitative realtime PCR in myocardial samples from mice treated as in Figure 2. N=3 mice per treatment group. Y axis = normalized transcript units. Bars denote full data range and mean for each replicate set. Open bars: sham-operated mice. Shaded bars: transverse aortic banded mice.

Figure S2. Wei, Joshi et al.

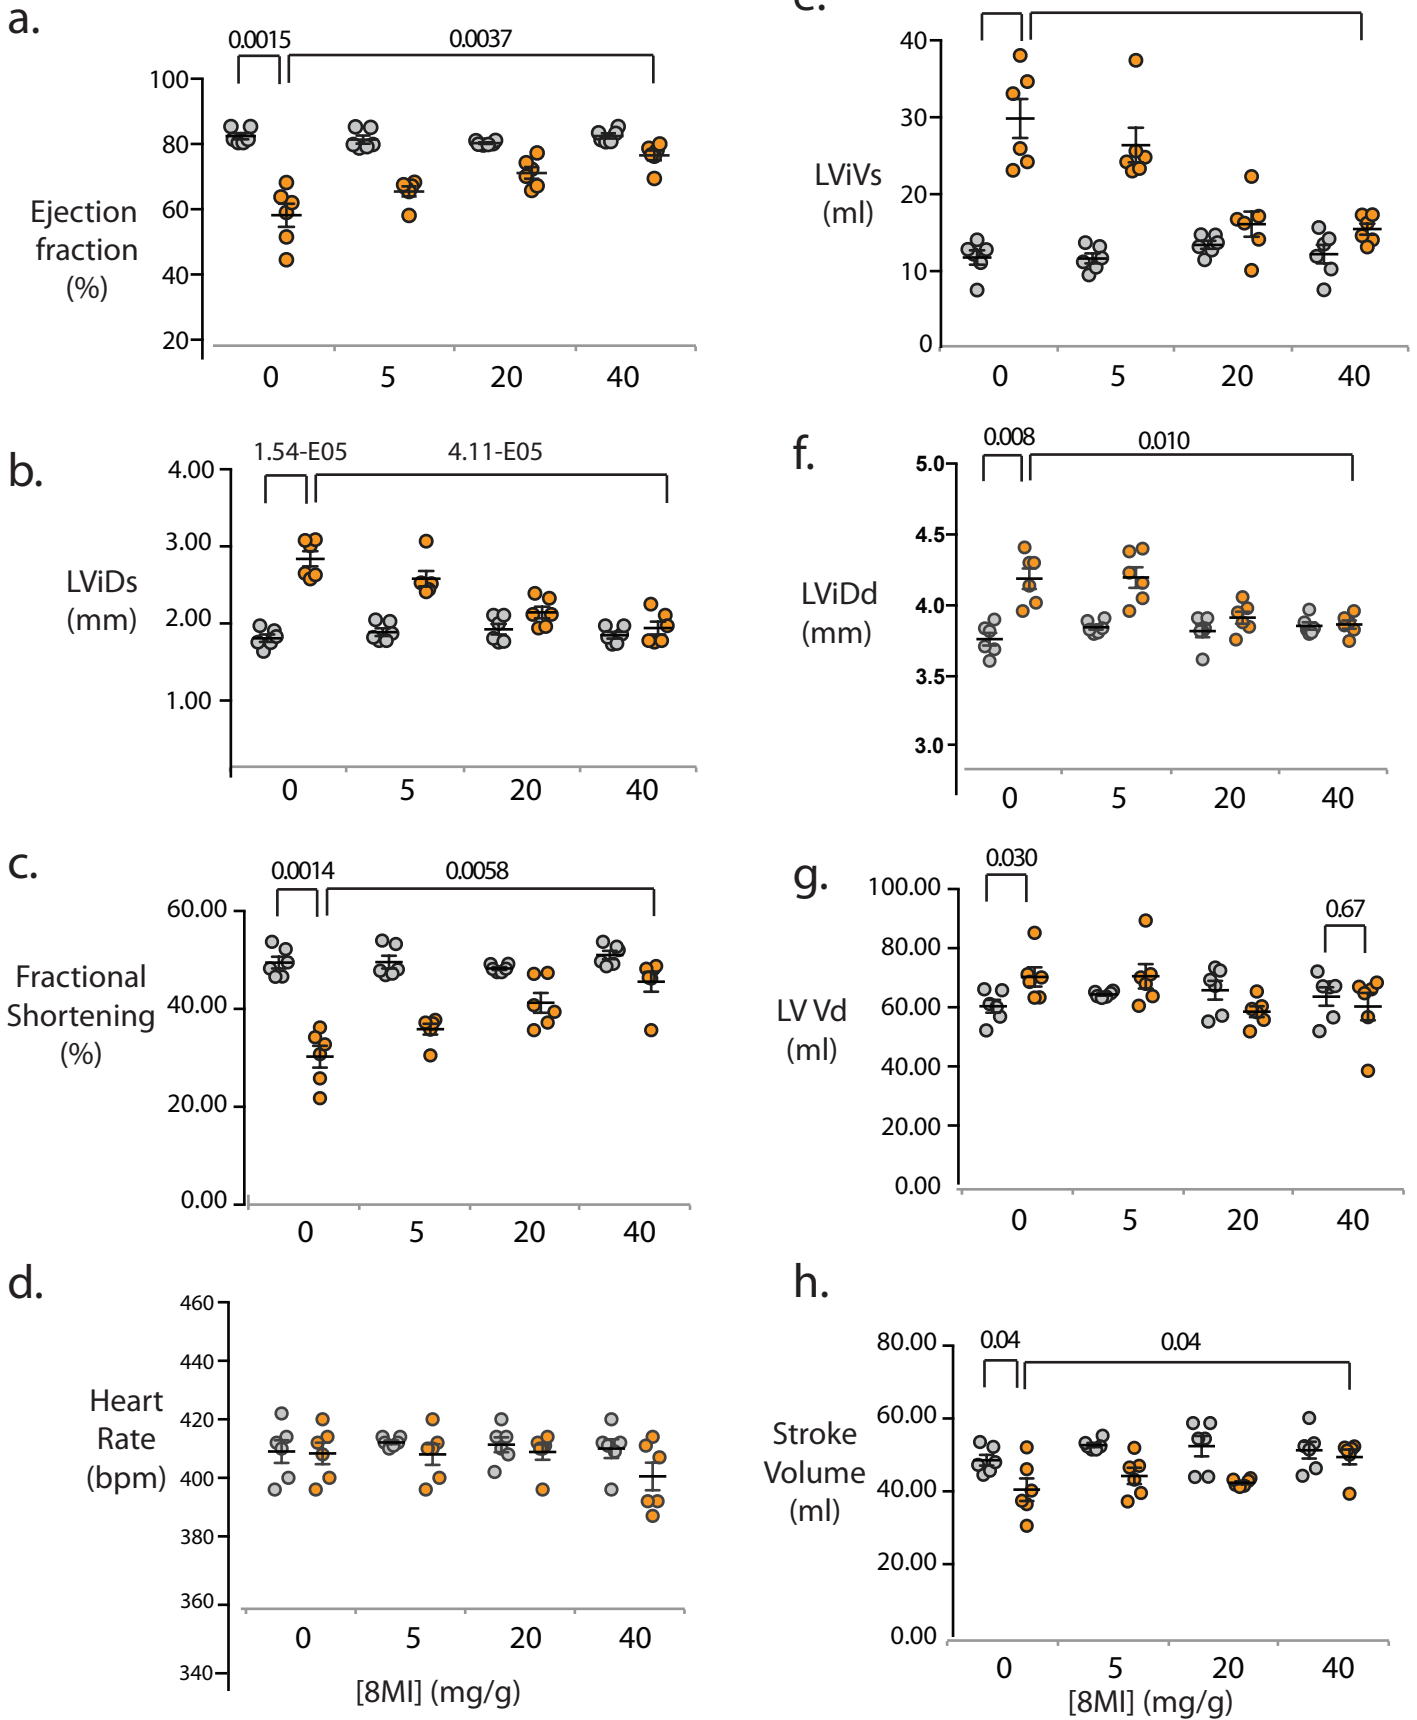

**Figure S2. 8MI preserves cardiac function after TAC.** Myocardial functional parameters including ejection fraction (EF, a.) and left ventricular internal diameter at end systole (LViDs, b.) were determined by echocardiography was performed 21 days post TAC or sham operation in mice receiving 8MI (5, 20 and 40 mg/kg) or its vehicle. N= 6 per experimental group.

### Supplemental Figure 3.

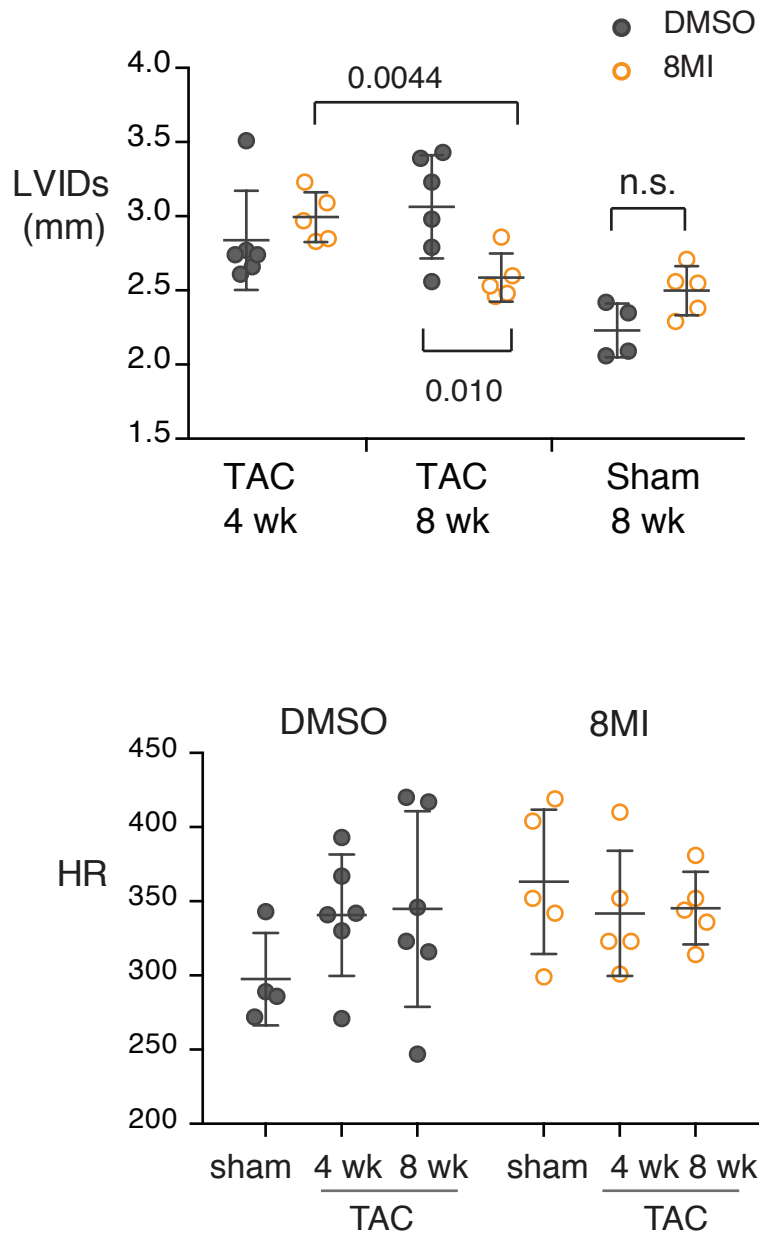

**Figure S3. Effect of 8MI on LV systolic dimension and heart rate after TAC.** Scatterplots indicate data points from individual mice (N=6 per group) with superimposed mean  $\pm$ SEM. Exact p values were calculated using ANOVA with post-hoc testing for multiple comparisons.

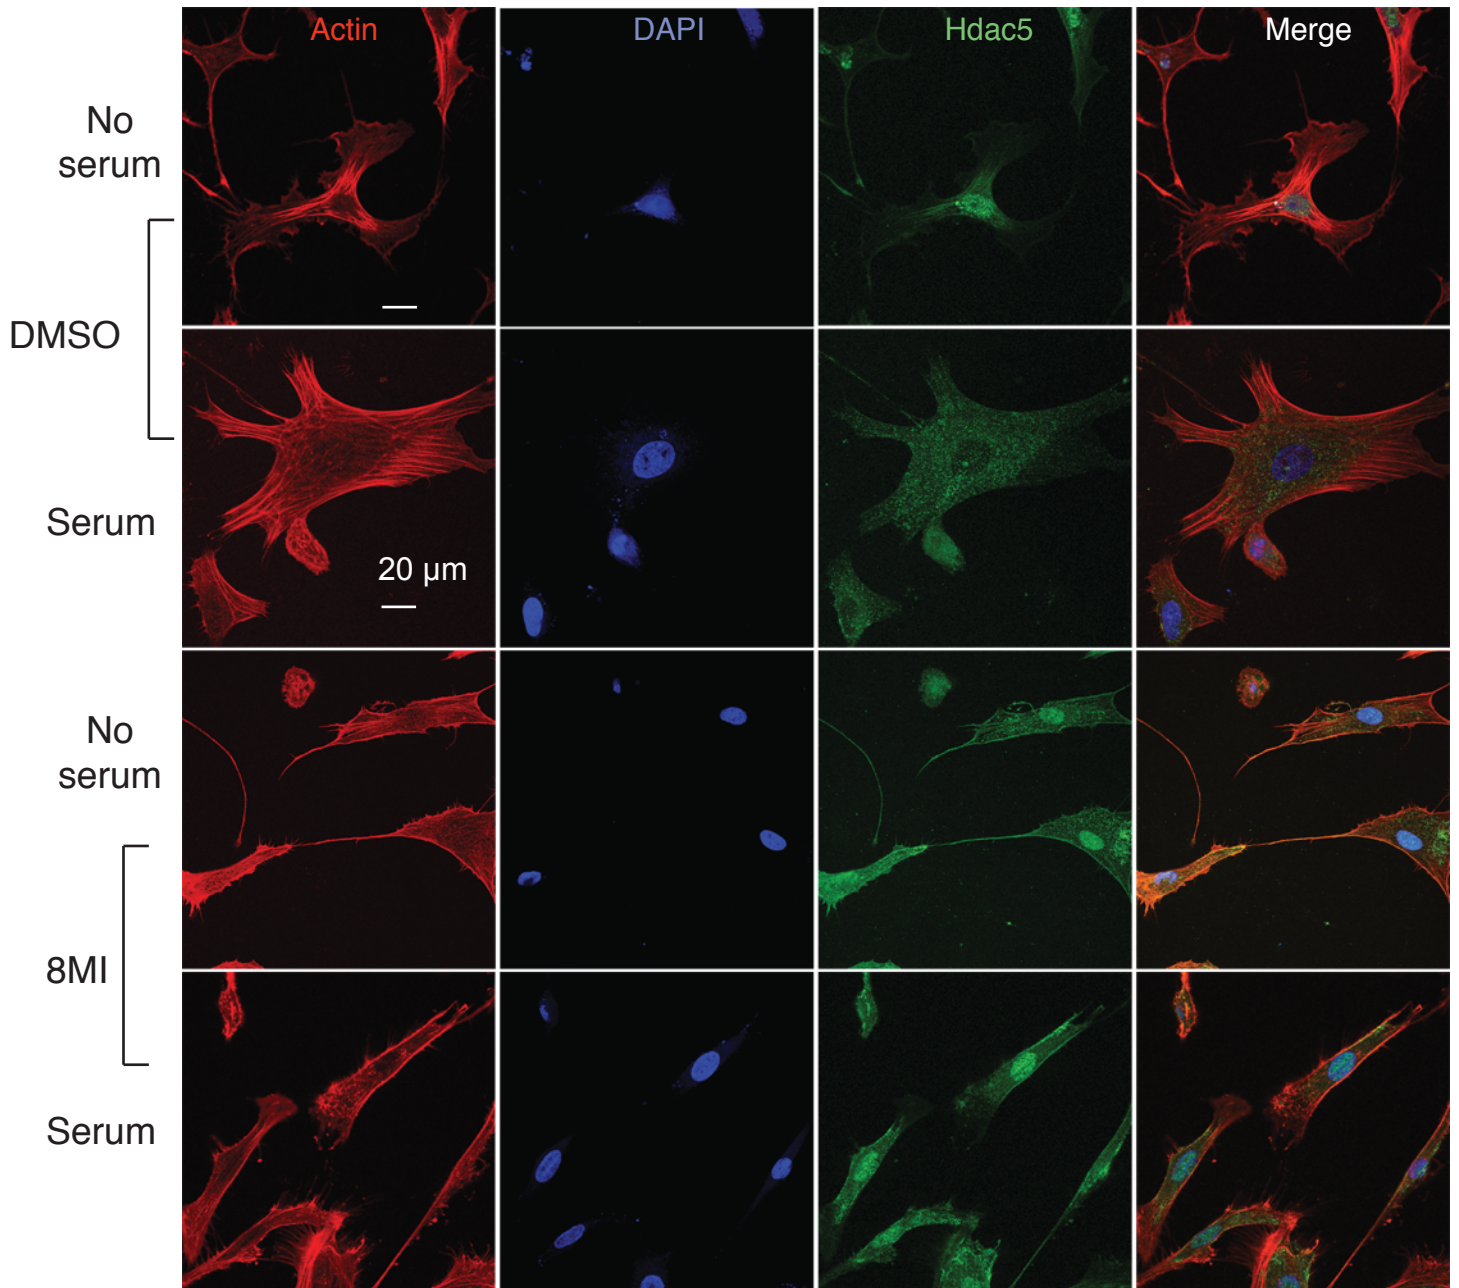

**Figure S4. 8MI prevents nuclear export of Hdac5 in response to serum.** NRVMs were obtained from 1 day old Sprague-Dawley rat hearts and cultured in serum-free media for 48 hours as described in Methods, and subsequently exposed to 5% FCS-containing media. Figures are representative of 3 independent experiments. Original magnification: 630x



**Supplemental Table 1. Characteristics of human subjects analyzed for this study.**

| <b>ID</b>  | <b>Gender</b> | <b>Condition</b>          | <b>Heart Weight (g)</b> | <b>Age</b> | <b>Ethnicity</b> | <b>Notes</b>                                                       |
|------------|---------------|---------------------------|-------------------------|------------|------------------|--------------------------------------------------------------------|
| 39306A1D   | Male          | non-failing               | 414                     | 55         | White            | Normal anatomy                                                     |
| 322A20D    | Male          | non-failing               | N/A                     | 46         | Black            | Stent in LAD, apical scarring                                      |
| 51565T_004 | Male          | non-failing               | 472                     | 40         | White            | Triple vessel CAD, septal infarct                                  |
| 1040640A3  | Male          | ICM                       | 476.6                   | 40         | White            | Severe concentric hypertrophy and chamber dilatation, ICD in place |
| 1030528A2  | Male          | ICM                       | 518                     | 42         | Black            | Biventricular dilatation and hypertrophy. interstitial fibrosis    |
| 1050968B3  | Male          | Hypertrophic, failing     | 840                     | 51         | Unknown          |                                                                    |
| 1040221A2  | Female        | Hypertrophic, failing     | 280                     | 33         | White            | Stent in LAD, aortic valve prosthesis                              |
| 1050508A3  | Female        | CHF                       | unknown                 | 59         | White            | Posterior infarction, fibrosis                                     |
| 1040319A3  | Male          | ICM, aortic valve disease | 548                     | 67         | White            | Concentric hypertrophy, patchy fibrosis, ICD in place              |
| 1030994A3  | Male          | ICM                       | 360                     | 39         | White            | s/p CABG, old anterior MI, concentric hypertrophy                  |
| 1062110A2  | Female        | ICM                       | 526                     | 62         | Black            | Stent in LAD, apical scarring                                      |
| 1030952A3  | Male          | ICM                       | 547                     | 62         | White            | Triple vessel CAD, septal infarct                                  |

**Supplemental Table 2. Serum chemistries in mice subjected to TAC or a sham operation and treated with indicated doses of 8MI.** Blood samples were obtained at sacrifice on day 21 after surgery and serum was frozen at 80 deg. C until analysis. Note that animal #5 (administered DMSO only) is in renal failure following TAC.

| <b>Animal ID</b> | <b>Treatment [8MI]</b> | <b>Procedure</b> | <b>Glucose (mg/dL)</b> | <b>BUN (mg/dL)</b> | <b>Creatinine (mg/dL)</b> | <b>Calcium (mg/dL)</b> | <b>Total Protein (g/dL)</b> | <b>ALT (U/L)</b> |
|------------------|------------------------|------------------|------------------------|--------------------|---------------------------|------------------------|-----------------------------|------------------|
| 1                | DMSO                   | Sham             | 24                     | 30                 | 0.5                       | 9.7                    | 5.5                         | 69               |
| 2                | DMSO                   | Sham             | 135                    | 26                 | 0.4                       | 10.7                   | 6.6                         | 65               |
| 3                | DMSO                   | Sham             | 295                    | 21                 | 0.5                       | 10.4                   | 5.8                         | 98               |
| 4                | DMSO                   | TAC              | <10                    | 314                | 7.5                       | 11.3                   | 6.1                         | 536              |
| 5                | DMSO                   | TAC              | 205                    | 21                 | 0.3                       | 11.5                   | 6.0                         | 73               |
| 6                | DMSO                   | TAC              | 188                    | 27                 | 0.4                       | 12.2                   | 6.3                         | 377              |
| 7                | 5 mg/kg                | TAC              | 375                    | 26                 | 0.2                       | 11.7                   | 5.6                         | 47               |
| 8                | 5 mg/kg                | TAC              | 158                    | 21                 | 0.2                       | 9.7                    | 5.8                         | 53               |
| 9                | 5 mg/kg                | TAC              | 294                    | 25                 | 0.2                       | 11                     | 5.4                         | 58               |
| 10               | 20 mg/kg               | TAC              | 224                    | 21                 | 0.2                       | 9.9                    | 5.3                         | 51               |
| 11               | 20 mg/kg               | TAC              | 177                    | 19                 | 0.2                       | 10.3                   | 5.6                         | 73               |
| 12               | 20 mg/kg               | TAC              | 326                    | 28                 | 0.2                       | 11.1                   | 6.0                         | 57               |
| 13               | 40 mg/kg               | TAC              | 455                    | 21                 | 0.3                       | 10.6                   | 6.2                         | 56               |
| 14               | 40 mg/kg               | TAC              | 140                    | 26                 | 0.6                       | 8.7                    | 5.5                         | 308              |
| 15               | 40 mg/kg               | TAC              | 252                    | 23                 | 0.3                       | 10.1                   | 5.7                         | 60               |

**Supplemental Table 3. Annotations for hypertrophy-regulated genes.** Genes in this table appear in Blocks I-IV, Figure 6. Ontologies obtained through Mouse Genome Informatics (<http://www.informatics.jax.org>) and Gene, PubMed and OMIM databases at the National Center for Biotechnology Information (<http://www.ncbi.nlm.nih.gov>).

| I  | Gene ID | Annotation                                                                 | MGI locus                             | Function                                                                                                                                                                |
|----|---------|----------------------------------------------------------------------------|---------------------------------------|-------------------------------------------------------------------------------------------------------------------------------------------------------------------------|
|    | Agt     | Angiotensinogen; serpin 8a (serpin peptidase inhibitor, clade A, member 8) | Chr8:<br>124556587-<br>124569707 (-)  | serine protease inhibitor; maintenance of blood pressure; pathogenesis of essential hypertension                                                                        |
|    | Tfrc    | Transferrin receptor protein 1                                             | Chr16:<br>32608920-<br>32632794 (+)   | cell surface receptor; cellular iron uptake by receptor-mediated endocytosis; required for erythropoiesis                                                               |
|    | Gm7120  | Transmembrane protein C5orf28 homolog                                      | Chr13:<br>119487941-<br>119495505 (+) | integral membrane protein; interacts with Alzheimer-associated tubulin polymerization promoting protein TPPP                                                            |
|    | Cd79b   | B-cell antigen receptor complex-associated protein beta chain              | Chr11:<br>106311341-<br>106314762 (-) | immunoglobulin receptor superfamily; integral membrane protein complex; adaptive immunity; B cell proliferation, differentiation                                        |
|    | Acta1   | actin, alpha 1, skeletal muscle                                            | Chr8:<br>123891767-<br>123894736 (-)  | constituent of the contractile apparatus; thin filament protein; associated with cardiac hypertrophy                                                                    |
|    | Lman1l  | Protein ERGIC-53-like                                                      | Chr9: 57607085-<br>57620774 (-)       | Protein processing in endoplasmic reticulum; ER-Golgi intermediate compartment; vesicle transport                                                                       |
|    | Dct     | dopachrome tautomerase; TRP-2; TYRP2                                       | Chr14:11801279<br>2-118052246 (-)     | Melanin biosynthesis; oxidase; oxygenase; isomerase                                                                                                                     |
|    | Mmp3    | Stromelysin-1                                                              | Chr9:7445822-<br>7455972 (+)          | Metalloprotease; wound repair; degrades ECM components fibronectin, laminin, collagens, proteoglycans                                                                   |
|    | Dkk3    | dickkopf WNT signaling pathway inhibitor 3                                 | Chr7:112116019-<br>112159057 (-)      | Antagonist of canonical Wnt signalling; negative regulator of aldosterone and cortisol biosynthesis; expressed in heart, brain, and spinal cord                         |
|    | Tceal7  | transcription elongation factor A (SII)-like 7; Bex4                       | ChrX:136214779-<br>136226100 (+)      | Tumor suppressor; negative regulation of c-Myc and NFkB transcription                                                                                                   |
|    | Nppb    | natriuretic peptide B                                                      | Chr4:147985788-<br>147987205 (+)      | peptide hormone; associated with cardiac hypertrophy                                                                                                                    |
| II | Myh7    | myosin, heavy chain 7, cardiac muscle, beta                                | Chr14:54970688-<br>54994634 (-)       | actin binding motor protein; component of contractile apparatus; associated with cardiac hypertrophy                                                                    |
|    | Nuak1   | NUAK family, SNF1-like kinase, 1; AMPK-related kinase, Ark5                | Chr10:84370905-<br>84440597 (-)       | non-receptor serine/threonine protein kinase; inhibitor of mTORC1 signalling pathway; maintenance of mitochondrial respiratory chain complexes and respiratory capacity |
|    | Nppa    | natriuretic peptide A                                                      | Chr4:148000722-<br>148002079 (+)      | peptide hormone; associated with cardiac hypertrophy                                                                                                                    |

|     |          |                                                                  |                              |                                                                                                                                                                        |
|-----|----------|------------------------------------------------------------------|------------------------------|------------------------------------------------------------------------------------------------------------------------------------------------------------------------|
|     | Apod     | apolipoprotein D                                                 | Chr16:31296192-31314808 (-)  | Lipocalin/cytosolic fatty-acid binding domain Resistance to oxidant stress                                                                                             |
|     | Wisp2    | WNT1-inducible-signaling pathway protein 2; Ccn5                 | Chr2:163820861-163833146 (+) | Mesenchymal cell-derived activator of canonical Wnt signaling; repressor of stemness; adipogenesis of MSCs                                                             |
|     | Mybpc2   | myosin binding protein C, fast type                              | Chr7:44501699-44524669 (-)   | cytoskeletal protein; non-membrane-bound organelle; component of contractile apparatus                                                                                 |
|     | Cry1     | cryptochrome circadian clock 1                                   | Chr10:85131702-85185054 (-)  | DNA photolyase; nuclear protein; mitochondrial protein; adenine dinucleotide-binding; key component of circadian core oscillator complex; regulator of circadian clock |
|     | Col5a2   | Collagen alpha-2(V) chain                                        | Chr2:27886425-28039514 (+)   | extracellular matrix structural protein; Expressed in fetal myocardium and adult heart valves                                                                          |
|     | Bgn      | Biglycan                                                         | ChrX:73483602-73495933 (+)   | cytokine; extracellular matrix protein; required for normal body weight; targeted by miR466 family                                                                     |
|     | Abra     | Actin-binding Rho-activating protein; STARS                      | Chr15:41865293-41869720 (-)  | required for arteriogenesis after vascular occlusion                                                                                                                   |
|     | Vim      | Vimentin                                                         | Chr2:13573927-13582826 (+)   | Class III intermediate filament; required for endothelin-NO balance, flow-mediated dilatation                                                                          |
|     | Mt2      | Metallothionein-2                                                | Chr8:94172618-94173567 (+)   | Metallothionein, vertebrate, metal binding site, NO signalling, copper detoxification, xenobiotic sensitivity                                                          |
|     | Adamtsl2 | ADAMTS-like protein 2                                            | Chr2:27079379-27108981 (+)   | Metalloprotease; extracellular matrix glycoprotein; serine protease inhibitor                                                                                          |
|     | Mfap4    | Microfibril-associated glycoprotein 4                            | Chr11:61485431-61488900 (+)  | Required for elastinogenesis; oxidative stress defense                                                                                                                 |
|     | Col1a2   | Collagen alpha-2(I) chain                                        | Chr6:4504814-4541543 (+)     | Extracellular matrix structural protein; Repair of myocardial damage and prevention of post-MI rupture; myocardial tensile strength                                    |
|     | Fdn3     | Endothelin-3                                                     | Chr2:174760619-174784042 (+) | Melanocyte development; neural crest-derived neural precursors; peptide hormone                                                                                        |
|     | Fnpp1    | Ectonucleotide pyrophosphatase/phosphodiesterase family member 1 | Chr10:24637914-24712159 (-)  | Pyrophosphatase; nucleotide phosphatase; Inhibitor of ectopic calcification; negative regulator of FGF-23 and phosphaturia; inhibitor of osteocalcin                   |
|     | Thbs4    | Thrombospondin-4                                                 | Chr13:92751590-92794818 (-)  | Matrix-myocyte signalling; adaptation to pressure overload; promotion of ER stress response                                                                            |
| III | Emp1     | Epithelial membrane protein 1                                    | Chr6:135362931-135383173 (+) | Integral tetraspan membrane protein, belonging to the PMP-                                                                                                             |

|         |                                            |                                    |                                                                                                                                                                                                                                    |
|---------|--------------------------------------------|------------------------------------|------------------------------------------------------------------------------------------------------------------------------------------------------------------------------------------------------------------------------------|
|         |                                            |                                    | 22/EMP/MP20/Claudin family; regulator of adherens and apical tight junction formation                                                                                                                                              |
| Cysltr1 | Cysteinyl leukotriene receptor 1           | ChrX:106574346-106603679 (-)       | G-protein coupled receptor; Regulator of vascular permeability during inflammation; eosinophilogenesis; Th2 immunity                                                                                                               |
| Fhl1    | Four and a half LIM domains protein 1      | ChrX:56731787-56793346 (+)         | Homeobox transcription factor; zinc finger transcription factor; RNA binding protein; actin family cytoskeletal protein; promotes NFATc transcription and hypertrophy; negative regulator of titin phosphorylation and mechanics   |
| Fuca2   | Plasma alpha-L-fucosidase                  | Chr10:13499540-13519035 (+)        | Alpha-L-fucosidase in plasma and fibroblasts; may also have transglycosylation properties                                                                                                                                          |
| Tbx15   | T-box transcription factor TBX15           | Chr3:99240381-99354259 (+)         | Transcription factor; regulates glycolytic fiber; promotes oxygen consumption, spontaneous activity, and glucose consumption.                                                                                                      |
| Fstl1   | Follistatin-related protein 1              | Chr16:37776873-37836514 (+)        | BMP4 antagonist; secreted from adult heart; repressor of hypertrophy; activator of AMPK; pneumocyte differentiation and maturation                                                                                                 |
| Col14a1 | Collagen alpha-1(XIV) chain                | Chr15:55307750-55520803 (+)        | Formation of cardiac interstitium; promotion of collagen network supporting myocardial cell survival and function                                                                                                                  |
| Col8a1  | Collagen alpha-1(VIII) chain               | Chr16:57624258-57754737 (-)        | extracellular matrix structural protein; cell adhesion molecule                                                                                                                                                                    |
| Fibin   | Fin bud initiation factor homolog          | Chr2:110360917-110363183 (-)       | Essential for pectoral fin bud initiation in fish; control of tbx5 expression                                                                                                                                                      |
| Mfap5   | Microfibrillar-associated protein 5; MAGP2 | Chr6:122505845-122529290 (+)       | Extracellular matrix glycoprotein; microfibril component; regulates aortic elastogenesis; binds active TGFβ1, TGFβ2, and BMP2                                                                                                      |
| Myot    | Myotilin                                   | Chr18:44334074-44355724 (+)        | Protein phosphatase; immunoglobulin receptor superfamily; muscle-specific Z-disc protein; assembly and structural upkeep of the sarcomere in fast fibers                                                                           |
| IV      | Aldob                                      | Fructose-bisphosphate aldolase B;  | Chr4:49535995-49549546 (-)                                                                                                                                                                                                         |
|         | Ucp3                                       | Mitochondrial uncoupling protein 3 | Chr7:100472990-100486432 (+)                                                                                                                                                                                                       |
|         |                                            |                                    | Gluconeogenesis, glycolysis; fructose metabolism; hereditary fructose intolerance;                                                                                                                                                 |
|         |                                            |                                    | Mitochondrial carrier protein; mitochondrial inner membrane protein; adaptation to reduced cellular energy balance via increased FAO and reduced oxidative stress; mitochondrial uncoupling and reduced cardiac caloric efficiency |

|         |                                                      |                               |                                                                                                                                                      |
|---------|------------------------------------------------------|-------------------------------|------------------------------------------------------------------------------------------------------------------------------------------------------|
| Gm1078  | Sbk3, SH3 domain binding kinase family, member 3     | Chr7:4965260-4971168 (-)      | ATP binding, serine-threonine kinase activity                                                                                                        |
| Angpt1  | Angiopoietin-1; Angpt1                               | Chr15:42424727-42676977 (-)   | regulation of ischemic damage; coronary vessel formation; endothelial survival; protection against diabetic nephropathy                              |
| Tmem56  | Transmembrane protein 56; Tmem56                     | Chr3:121201761-121283098 (-)  | Extensively conserved transmembrane protein (also in Aradopsis and rice), 276 aa protein                                                             |
| Gm10635 | Noncoding RNA                                        | Chr9:79444037-79519302 (-)    | Non-coding RNA, 3 exons                                                                                                                              |
| Kcnv2   | Potassium voltage-gated channel subfamily V member 2 | Chr19:27322588-27337179 (+)   | Encodes Kv8.2, Kv11.1,; Ikr, delayed rectifier K+ channel; upregulated from fetal to adult life                                                      |
| Gm6416  | lncRNA                                               | Chr13:117130025-117135884 (+) | Non-coding RNA, 4 exons; expressed in postnatal and adult aorta and vein; induced in hypertensive aorta and myocardium, downregulated in hypotension |
| Cngb3   | Cyclic nucleotide-gated cation channel beta-3; Cngb3 | Chr4:19280850-19510623 (+)    | cyclic nucleotide-gated ion channel; voltage-gated potassium channel; CAMP signalling, cGMP binding, response to stimulus; color vision              |
| Gm19689 | lncRNA                                               | Chr17:83033592-83078225 (-)   | Non-coding RNA, 4 exons; high expression in heart and brown fat                                                                                      |
| Cenpf   | Centromere protein F, LEK1                           | Chr1:189640606-189688086 (-)  | Rb binding, nuclear localization, active cell division, cardiomyocyte division, myoblast growth arrest                                               |
| Ccl11   | Eotaxin; Ccl11; Chemokine (C-C-motif) ligand 11      | Chr11:82057823-82062955 (+)   | chemokine(PC00207); smooth muscle cell migration; eosinophil chemotaxis; inflammation; IL-6 production                                               |

**Supplemental Table 4. Upstream regulators and networks of hypertrophy-responsive genes.** Ingenuity® software was used to identify common upstream regulators and network members of genes induced (+) or repressed (-) by TAC and normalized by 8MI.

| Pathway/<br>regulator | Genes affected                                                                                   | +/- | P value for<br>overlap | Network                                                                 |
|-----------------------|--------------------------------------------------------------------------------------------------|-----|------------------------|-------------------------------------------------------------------------|
| Gata4                 | Acta1, Ankrd1, Dio2, Ltbp2, Myh7, Nppa, Timp1                                                    | +   | 4.59E-09               | Gata4, Nkx2-5                                                           |
| Tgfb1                 | Acta1, Ankrd1, Col8a1, Dusp4, F2r1, Fhl1, Fstl3, Gdf6, Ltbp2, Myh7, Nppa, Scd, Timp1, Tnc, Wisp2 | +   | 6.68E-09               | Crebbp, Egfr, Ep300, Mkl1, Myc, Sp1, Srf, Tgfb1, Tnf                    |
| Raf1                  | Ankrd1, Dio2, Dusp4, Itgb4, Nppa, Timp1, Wisp2                                                   | +   | 3.24E-08               | Erk1/2, Fos, Jun, Myc, P38 Mapk, Raf1                                   |
| Camk2d                | Acta1, Myh7, Nppa                                                                                | +   | 1.26E-06               | Camk2d, Gata4, Hdac5, Mef2c, Nkx2.5                                     |
| Fos                   | Agt, Dio2, Itgb4, Ltbp2, Nppa, Scd, Timp1, Tll2                                                  | +   | 1.27E-06               | Fos, Fosl2, Jun                                                         |
| Hdac5                 | Acta1, Myh7, Nppa, Scd                                                                           | +   | 1.50E-06               | Gata4, Hdac5, Mef2c, Mef2d                                              |
| Egfr                  | Acta1, Col8a1, Dusp4, F2r1, Nppa, Tnc,                                                           | +   | 6.73E-06               | Egfr, Ep300, Myc, Sp1                                                   |
| Srf                   | Acta1, Ankrd1, Fhl1, Myh7, Nppa, Tnc,                                                            | +   | 8.40E-06               | Mkl1, Ptk2, Srf, Stat3                                                  |
| Mef2d                 | Acta1, Myh7, Nppa                                                                                | +   | 1.38E-05               | Gata4, Mef2d, Nkx2-5                                                    |
| Stat5b                | Ankrd1, Myh7, Nppa, Scd                                                                          | +   | 1.25E-04               | Akt1, Nfkb, Stat5b                                                      |
| Hdac9                 | Myh7, Nppa                                                                                       | +   | 1.29E-04               | Gata4, Hdac5, Hdac9, Mef2c, Mef2d                                       |
| Map3k7                | Acta1, Myh7, Nppa,                                                                               | +   | 1.43E-04               | Atf2, Gata4, Hdac5, Map2k3, Map2k4, Map2k6, Map3k7, Mef2a, Mef2c, Rcan1 |
| Nfkb                  | Agt, Ankrd1, F2r1, Hspa1, Nppa, Timp1                                                            | +   | 2.75E-04               |                                                                         |
| Cabin1                | Myh7, Nppa,                                                                                      | +   | 2.81E-04               | Cabin1, Calcineurin, Gata4, Hdac9, Mef2c, Mef2d, Nfatc3                 |
| Crebbp                | Agt, Dusp4, Myh7, Nppa, Tnc                                                                      | +   | 2.97E-04               | Crebbp, Ep300, Klf4, Myc, Sp1, Stat, Stat3                              |
| Smad4                 | Fstl3, Scd, Timp1, Tnc                                                                           | +   | 3.25E-04               | Ctnnb1, Jun, Smad3, Smad4                                               |
| Ppargc1a              | Dio2, Myh7, Nppa, Scd                                                                            | +   | 3.43E-04               | Ppara, Ppargc1a                                                         |
| Mef2c                 | Acta1, Myh7, Nppa                                                                                | +   | 3.99E-04               | Gata4, Hdac5, Mef2c, Mef2d, Nkx2-5                                      |
| Map2k3                | Atp2a2, Maob, Ppargc1a, Rgs7                                                                     | -   | 7.61E-05               |                                                                         |
| Ppargc1a              | Ccbl2, Cyp1a1, Maob, Ppargc1a, Uqcrfs1                                                           | -   | 6.84E-04               |                                                                         |
| Mapk8                 | Cyp1a1, Gstm1, Maob, Ppargc1a                                                                    | -   | 1.50E-03               |                                                                         |
| Map2k6                | Atp2a2, Ppargc1a, Rgs7                                                                           | -   | 1.75E-03               | Map2k6, Mef2a                                                           |
| Nfe2l2                | Creg1, Entpd5, Gstm1, Ppargc1a, Ptpd, Ryr3                                                       | -   | 1.81E-03               |                                                                         |
| Ppara                 | Acot1, Aldob, Ccbl2, Cyp1a1, Ppargc1a, Sord                                                      | -   | 2.27E-03               |                                                                         |
| Calcineurin<br>A      | ATP2A2, PPARGC1A                                                                                 | -   | 2.53E-03               | Calcineurin A, Mef2a                                                    |

**Supplemental Table 5. Promoter features of genes repressed by 8MI during pressure overload.** The set of genes induced by pressure overload and downregulated by 8MI (Repressed by 8MI) were compared with the motif gene set collection in MSigDB using Gene Set Enrichment Analysis {Subramanian, 2005 #10355}. Similar analysis was done on the set of genes upregulated in the presence of 8MI (Induced by 8MI). (K = # genes in comparator gene set. k = # genes overlapping in test set.

**Repressed by 8MI**

| Motif/Gene Set Name                   | K    | Promoter Element                                                                                  | k  | FDR q-value |
|---------------------------------------|------|---------------------------------------------------------------------------------------------------|----|-------------|
| TGGAAA_V\$NFAT_Q4_01                  | 1896 | NFAT, NFATC                                                                                       | 23 | 3.92E-09    |
| TGGNNNNNNKCCAR_UN<br>KNOWN            | 424  | Transcription factor unknown                                                                      | 9  | 4.73E-05    |
| GCANCTGNY_V\$MYOD_<br>Q6              | 924  | MYOD1: myogenic differentiation 1                                                                 | 12 | 8.10E-05    |
| TGANTCA_V\$AP1_C                      | 1121 | JUN: jun oncogene                                                                                 | 12 | 4.60E-04    |
| GGGAGGRR_V\$MAZ_Q6                    | 2274 | MAZ: MYC-associated zinc finger protein<br>(purine-binding transcription factor)                  | 17 | 5.04E-04    |
| GRRATG<br>V\$ TEF1_Q6                 | 226  | Similar to TEF-1                                                                                  | 6  | 7.00E-04    |
| NNNNNNKCTAWAAATAG<br>MNNNN V\$MEF2_02 | 228  | Myocyte enhancer factor-2; MEF2                                                                   | 6  | 7.00E-04    |
| WGGAATGY_V\$TEF1_Q6                   | 378  | TEAD1: TEA domain family member 1 (SV40<br>transcriptional enhancer factor)                       | 7  | 1.13E-03    |
| RYTTCCTG_V\$ETS2_B                    | 1085 | ETS2: v-ets erythroblastosis virus E26<br>oncogene homolog 2 (avian)                              | 10 | 4.87E-03    |
| CTAWWWATA_V\$RSRFC<br>4_Q2            | 361  | MEF2A: MADS box transcription enhancer<br>factor 2, polypeptide A (myocyte enhancer<br>factor 2A) | 6  | 5.14E-03    |

**Induced by 8MI**

|                                    |      |                                                                   |    |          |
|------------------------------------|------|-------------------------------------------------------------------|----|----------|
| NWADTAAWTANN<br>V\$NKX62_Q2        | 241  | NKX6-2: NK6 transcription factor related,<br>locus 2 (Drosophila) | 8  | 4.76E-06 |
| TTATGYTAAT<br>V\$POU3F2_02         | 260  | POU3F2: POU domain, class 3, transcription<br>factor 2            | 7  | 6.01E-05 |
| NNNNATGCAAATNAN<br>V\$OCT1_Q6      | 270  | POU2F1: POU domain, class 2, transcription<br>factor 1            | 7  | 6.01E-05 |
| NNNWAAAYAAAYANNNN<br>N V\$FOXJ2_01 | 184  | FOXJ2: forkhead box J2                                            | 6  | 7.82E-05 |
| TGACCTY_V\$ERR1_Q2                 | 1043 | ESRRA: estrogen-related receptor alpha                            | 11 | 9.54E-05 |
| AWKTGTTTGTTTA<br>V\$HFH4_01        | 200  | FOXJ1: forkhead box J1                                            | 6  | 9.54E-05 |
| NNNGATWANN<br>V\$GATA6_01          | 265  | GATA6: GATA binding protein 6                                     | 6  | 2.47E-04 |
| TGGAAA_V\$NFAT_Q4_01               | 1896 | NFAT. NFATC                                                       | 13 | 4.46E-04 |
